# Supplementary material
Source: Springer Nature journal article supplement (https://www.springermedizin.de/resource/supplementary/12936_2012_2820_MOESM3_ESM.pdf/9544330)
Supplement: MOESM3 [file 9544330]

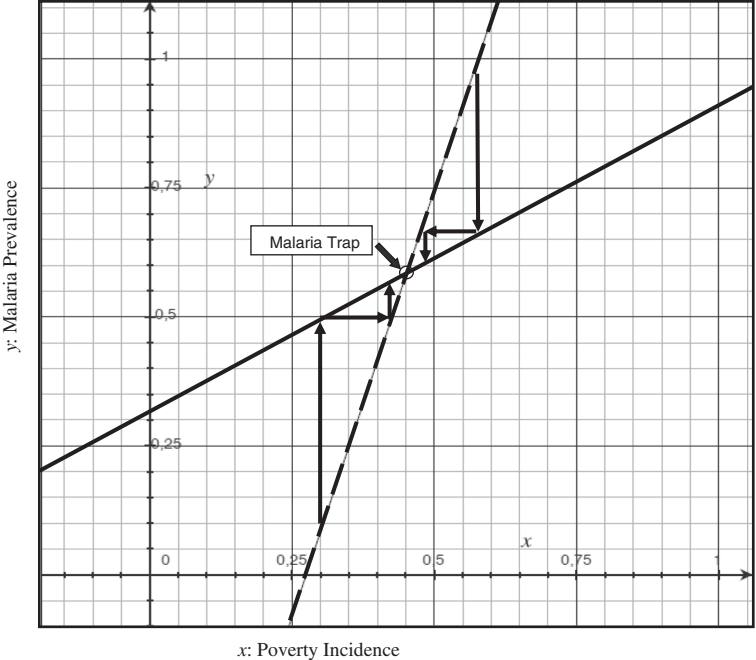

— Malaria as a function of poverty  
 $Malaria = 0,315 + 0,596 Poverty$

- - - Poverty as a function of malaria  
 $Poverty = 0,275 + 0,302 Malaria$
